# Supplementary material for: Desaturase Activity and the Risk of Type 2 Diabetes and Coronary Artery Disease: A Mendelian Randomization Study
Source: MDPI journal article supplement (doi:10.3390/nu12082261), 2020-07-28
Supplement: s1 [file s1]

# **Supplementary Material**

## **Desaturase activity and the risk of type 2 diabetes and coronary artery disease: a Mendelian randomization study**

Susanne Jäger, Rafael Cuadrat, Per Hoffmann, Clemens Wittenbecher,  
Matthias B. Schulze\*

\*Department of Molecular Epidemiology, German Institute of Human Nutrition Potsdam-Rehbruecke, Nuthetal, Germany.  
mschulze@dife.de (MBS)

### **Supplementary Tables:**

Supplemental Table 1 Instruments from FADS gene cluster for D6D ( $R^2 < 0.3$ ) and their association with T2DM or CAD

Supplemental Table 2 Instruments from FADS gene cluster for D5D ( $R^2 < 0.3$ ) and genome-wide hits and their association with T2DM or CAD

Supplemental Table 3 Total effects of estimated desaturase activities and risk of type 2 diabetes or coronary artery disease using MR-Egger

Supplemental Table 4 Total effects of estimated delta-5-desaturase activity and risk of type 2 diabetes excluding outlying variants

Supplemental Table 5 Total effects of estimated delta-5-desaturase activity and risk of coronary artery disease excluding outlying variant

Supplemental Table 6 Association between genetic instruments used in multivariable MR and estimated desaturase activities and risk of type 2 diabetes or coronary artery disease

Supplemental Table 7 Direct effects of estimated desaturase activities and risk of type 2 diabetes or coronary artery disease using multivariable MR-Egger

Supplemental Table 8 Direct effects of estimated desaturase activities and risk of type 2 diabetes or coronary artery disease excluding outlying variants

Supplemental Table 9 Direct effects of estimated desaturase activities and risk of type 2 diabetes or coronary artery disease excluding outlying variants

Supplemental Table 10 Total and direct effects of estimated desaturase activities and risk of type 2 diabetes and coronary artery disease accounting for confounding by LD, excluding rs174602

### **Supplementary Figures:**

Supplemental Figure 1 Flow-chart of final study population

Supplemental Figure 2 Manhattan plots visualizing GWAS results for D6D and D5D

Supplemental Figure 3 LD-Plot visualizing the degree of linkage disequilibrium between genetic instruments from *FADS* gene region evaluated within the study

Supplemental Figure 4 Scatter plots visualizing genetic associations with D6D and type 2 diabetes and coronary artery disease

Supplemental Figure 5 Scatter plots visualizing genetic associations with D5D and type 2 diabetes and coronary artery disease

Supplemental Figure 6 Radial MR plot for D5D and type 2 diabetes

Supplemental Figure 7 Scatter plots visualizing genetic associations with D5D and type 2 diabetes after outlier removal

Supplemental Figure 8 Scatter plots visualizing genetic associations with D5D and coronary artery disease after outlier removal

Supplemental Figure 9 Effect-size estimates and variant-level contribution to CAUSE test statistics for D6D and type 2 diabetes.

Supplemental Figure 10 Effect-size estimates and variant-level contribution to CAUSE test statistics for D6D and coronary artery disease.

Supplemental Figure 11 Effect-size estimates and variant-level contribution to CAUSE test statistics for D5D and type 2 diabetes.

Supplemental Figure 12 Effect-size estimates and variant-level contribution to CAUSE test statistics for D5D and coronary artery disease.

**Supplemental Table 1 Instruments from *FADS* gene cluster for D6D ( $R^2 < 0.3$ ) and their association with T2DM or CAD**

| Instruments            |                                 |                                |                            | D6D<br>(EPIC-Potsdam) |             |                 |              | T2DM<br>(Diagram) |             |                 |         | CAD<br>(Cardiogram) |             |                 |          |
|------------------------|---------------------------------|--------------------------------|----------------------------|-----------------------|-------------|-----------------|--------------|-------------------|-------------|-----------------|---------|---------------------|-------------|-----------------|----------|
| rsID                   | Chr:position<br>(Locus)         | Effect allele/<br>Other allele | Most severe<br>consequence | N                     | EAF<br>in % | Beta<br>(SE)    | P            | N                 | EAF<br>in % | Beta<br>(SE)    | P       | N                   | EAF<br>in % | Beta<br>(SE)    | P        |
| rs174567* <sup>#</sup> | 11:61593005<br>( <i>FADS2</i> ) | G/A                            | Upstream gene variant      | 1853                  | 33.5        | -0.36<br>(0.03) | 1.1<br>E-27  | 231420            | 35.0        | -0.03<br>(0.01) | 2.0e-05 | 335201              | 33.2        | -0.03<br>(0.01) | 7.09e-04 |
| rs2851682*             | 11:61616012<br>( <i>FADS2</i> ) | G/A                            | Intron variant             | 1853                  | 10.4        | -0.48<br>(0.05) | 3.25<br>E-20 | 231420            | 10.0        | -0.02<br>(0.01) | 4.9e-02 | 335264              | 9.37        | -0.02<br>(0.01) | 1.42e-01 |
| rs174602               | 11:61624414<br>( <i>FADS2</i> ) | C/T                            | Intron variant             | 1853                  | 19.6        | -0.19<br>(0.04) | 1.13<br>E-05 | 231420            | 20.0        | -0.03<br>(0.01) | 2.4e-04 | 328726              | 21.9        | -0.03<br>(0.01) | 1.50e-02 |
| rs498793               | 11:61624705<br>( <i>FADS2</i> ) | C/T                            | Intron variant             | 1853                  | 59.8        | -0.17<br>(0.03) | 6.41<br>E-07 | 231420            | 60.0        | -0.02<br>(0.01) | 3.3e-03 | 328640              | 59.7        | -0.02<br>(0.01) | 3.36e-02 |
| rs7118175              | 11:61639358<br>( <i>FADS2</i> ) | C/T                            | Downstream gene variant    | 1853                  | 8.90        | -0.23<br>(0.05) | 3.97<br>E-05 | 231420            | 8.00        | -0.01<br>(0.01) | 3.9e-01 | 328601              | 9.70        | -0.03<br>(0.02) | 3.82e-02 |
| rs174465 <sup>#</sup>  | 11:61658800<br>( <i>FADS3</i> ) | C/T                            | Synonymous variant         | 1853                  | 30.8.2      | -0.19<br>(0.04) | 1.68<br>E-07 | 231420            | 31.0        | -0.01<br>(0.01) | 1.7e-01 | 335142              | 33.4        | -0.02<br>(0.01) | 1.07e-02 |

CAD, coronary artery disease; D6D, delta-6-desaturase; EAF, effect allele frequency; SE, standard error; T2DM, type 2 diabetes

<sup>#</sup> Not used in multivariable MR; \* genome-wide significant

**Supplemental Table 2 Instruments from *FADS* gene cluster for D5D ( $R^2<0.3$ ) and genome-wide hits and their association with T2DM or CAD**

| Instruments |                                        |                                |                            | D5D<br>(EPIC-Potsdam) |             |                 |           | T2DM<br>(Diagram) |             |                 |         | CAD<br>(Cardiogram) |             |                 |          |
|-------------|----------------------------------------|--------------------------------|----------------------------|-----------------------|-------------|-----------------|-----------|-------------------|-------------|-----------------|---------|---------------------|-------------|-----------------|----------|
| rsID        | Chr:position<br>(Locus)                | Effect allele/<br>Other allele | Most severe<br>consequence | N                     | EAF<br>in % | Beta<br>(SE)    | P         | N                 | EAF<br>in % | Beta<br>(SE)    | P       | N                   | EAF<br>in % | Beta<br>(SE)    | P        |
| rs2608073*  | 3:142653512<br>( <i>RP11-372E1.4</i> ) | T/C                            | Intron variant             | 1853                  | 8.46        | -0.38<br>(0.06) | 1.08E-09  | 231420            | 8.9         | 0.01<br>(0.01)  | 4.5e-01 | 328077              | 7.47        | 0.01<br>(0.02)  | 2.17e-01 |
| rs174555*   | 11:61579760<br>( <i>FADS1</i> )        | C/T                            | Intron variant             | 1853                  | 28.3        | -0.83<br>(0.03) | 3.2E-140  | 231420            | 31.0        | -0.02<br>(0.01) | 4.4e-04 | 335215              | 29.1        | -0.02<br>(0.01) | 3.89e-03 |
| rs61897792  | 11:61586886<br>( <i>FADS1</i> )        | C/T                            | Upstream gene<br>variant   | 1853                  | 90.1        | -0.35<br>(0.06) | 1.05E-08  | 231420            | 89.0        | -0.02<br>(0.01) | 9.7e-02 | 321707              | 90.2        | -0.05<br>(0.02) | 1.60e-03 |
| rs174582*   | 11:61607168<br>( <i>FADS2</i> )        | G/A                            | Intron variant             | 1853                  | 20.7        | -0.82<br>(0.04) | 1.95E-106 | 231420            | 22.0        | -0.02<br>(0.01) | 6.0e-03 | 335290              | 20.2        | -0.03<br>(0.01) | 1.58e-03 |
| rs174602*   | 11:61624414<br>( <i>FADS2</i> )        | C/T                            | Intron variant             | 1853                  | 19.6        | -0.35<br>(0.04) | 1.63E-15  | 231420            | 20.0        | -0.03<br>(0.01) | 2.4e-04 | 328726              | 21.9        | -0.03<br>(0.01) | 1.50e-02 |
| rs498793*   | 11:61624705<br>( <i>FADS2</i> )        | C/T                            | Intron variant             | 1853                  | 59.8        | -0.28<br>(0.04) | 1.47E-15  | 231420            | 60.0        | -0.02<br>(0.01) | 3.3e-03 | 328640              | 59.7        | -0.02<br>(0.01) | 3.36e-02 |
| rs174621*   | 11:61630104<br>( <i>FADS2</i> )        | A/G                            | Intron variant             | 1853                  | 20.8        | -0.60<br>(0.04) | 1.72E-52  | 231420            | 22.0        | -0.01<br>(0.01) | 7.3e-02 | 323951              | 21.6        | -0.02<br>(0.01) | 1.41e-02 |
| rs508768    | 11:61639335<br>( <i>FADS3</i> )        | A/G                            | Downstream<br>gene variant | 1853                  | 91.9        | -0.28<br>(0.06) | 3.04E-06  | 231420            | 91.0        | 0.02<br>(0.01)  | 9.9e-02 | 323995              | 91.3        | -0.02<br>(0.02) | 6.51e-02 |
| rs7118175   | 11:61639358<br>( <i>FADS2</i> )        | C/T                            | Downstream<br>gene variant | 1853                  | 8.9         | -0.32<br>(0.06) | 4.59E-08  | 231420            | 8.00        | -0.01<br>(0.01) | 3.9e-01 | 328601              | 9.7         | -0.03<br>(0.02) | 3.82e-02 |
| rs174462*   | 11:61657666<br>( <i>FADS3</i> )        | A/G                            | Upstream gene<br>variant   | 1853                  | 16.2        | -0.49<br>(0.04) | 6.57E-27  | 231420            | 16.0        | 0.002<br>(0.01) | 8.6e-01 | 335294              | 17.7        | -0.02<br>(0.01) | 3.95e-02 |
| rs11644601* | 16:15172118<br>( <i>RRN3</i> )         | C/T                            | Intron variant             | 1853                  | 26.5        | -0.24<br>(0.04) | 5.24E-10  | 231420            | 30.0        | -0.02<br>(0.01) | 2.6e-03 | 324904              | 26.8        | -0.02<br>(0.01) | 1.13e-02 |

CAD, coronary artery disease; D5D, delta-5-desaturase; EAF, effect allele frequency; SE, standard error; T2DM, type 2 diabetes; <sup>#</sup> Not used in multivariable MR;

\* genome-wide significant

**Supplemental Table 3 Total effects of estimated desaturase activities and risk of type 2 diabetes or coronary artery disease using MR-Egger**

| T2DM                                                 |           |                       |             |                            | CAD        |                       |             |                               |
|------------------------------------------------------|-----------|-----------------------|-------------|----------------------------|------------|-----------------------|-------------|-------------------------------|
|                                                      | N (SNPs)* | OR<br>(95% CI)        | P-<br>value | Intercept (SE),<br>p-value | N (SNPs)** | OR<br>(95% CI)        | P-<br>value | Intercept<br>(SE),<br>p-value |
| <b>D6D</b> instruments from <i>FADS</i>              | 6         | 1.04<br>(0.98 - 1.10) | 0.203       | 0.012 (0.009),<br>0.185    | 6          | 1.02<br>(0.94 - 1.11) | 0.670       | 0.016 (0.012),<br>0.172       |
| <b>D5D</b> instruments from <i>FADS</i>              | 9         | 1.00<br>(0.98 - 1.05) | 0.540       | 0.011 (0.011),<br>0.306    | 9          | 1.01<br>(0.97 - 1.04) | 0.751       | 0.022 (0.009),<br>0.018       |
| instruments from <i>FADS</i><br>and genome-wide hits | 11        | 1.03<br>(1.00 - 1.06) | 0.049       | 0.006 (0.007),<br>0.377    | 11         | 1.00<br>(0.98 - 1.03) | 0.801       | 0.021 (0.006),<br>0.001       |

CI, confidence interval; D5D, delta-5-desaturase; D6D, delta-6-desaturase; SE, standard error

\*Of the 11/7 SNPs associated with D5D/D6D, 11/7 were available in the GWAS of T2DM (Mahajan et al. 2018).

After harmonization and removal of palindromic SNPs with intermediate allele frequencies, 9/6 SNPs were included in the MR analysis on T2DM.

\*\*Of the 11/7 SNPs associated with D5D/D6D, 10/6 were available in the GWAS of CAD (Nelson et al. 2017).

After harmonization and removal of palindromic SNPs with intermediate allele frequencies, 9/6 SNPs were included in the MR analysis on CAD.

**Supplemental Table 4 Total effects of estimated delta-5-desaturase activity and risk of type 2 diabetes excluding outlying variants**

| Method                    | instruments from <i>FADS</i> |                       |         |                            | instruments from <i>FADS</i> and genome-wide hits |                       |         |                            |
|---------------------------|------------------------------|-----------------------|---------|----------------------------|---------------------------------------------------|-----------------------|---------|----------------------------|
|                           | N (SNPs)*                    | OR (95% CI)           | P-Value | Intercept (SE),<br>p-value | N (SNPs)*                                         | OR (95% CI)           | P-Value | Intercept (SE),<br>p-value |
| MR-Egger                  | 7                            | 1.01<br>(0.98 - 1.04) | 0.635   | 0.013 (0.010), 0.219       | 9                                                 | 1.01<br>(0.98 - 1.04) | 0.638   | 0.011 (0.008), 0.163       |
| Inverse variance weighted | 7                            | 1.03<br>(1.02 - 1.04) | <0.001  |                            | 9                                                 | 1.03<br>(1.01 - 1.04) | <0.001  |                            |

CI, confidence interval; SE, standard error

\*two outlying instruments (rs174602, rs508768) determined by radial MR with alpha=0.05 were excluded from analyses.

**Supplemental Table 5 Total effects of estimated delta-5-desaturase activity and risk of coronary artery disease excluding outlying variant**

| Method                    | instruments from <i>FADS</i> |                       |         |                            | instruments from <i>FADS</i> and genome-wide hits |                       |         |                            |
|---------------------------|------------------------------|-----------------------|---------|----------------------------|---------------------------------------------------|-----------------------|---------|----------------------------|
|                           | N (SNPs)*                    | OR (95% CI)           | P-Value | Intercept (SE),<br>p-value | N (SNPs)*                                         | OR (95% CI)           | P-Value | Intercept (SE),<br>p-value |
| MR-Egger                  | 8                            | 1.01<br>(0.96 - 1.07) | 0.661   | 0.017 (0.015), 0.280       | 10                                                | 1.01<br>(0.98 - 1.04) | 0.546   | 0.016 (0.008), 0.049       |
| Inverse variance weighted | 8                            | 1.03<br>(1.01 - 1.05) | 0.002   |                            | 10                                                | 1.03<br>(1.01 - 1.06) | 0.003   |                            |

CI, confidence interval; SE, standard error

\*one possibly outlying instrument (rs61897792) determined by radial MR with alpha = 0.1 was excluded from analyses.

**Supplemental Table 6 Association between genetic instruments used in multivariable MR and estimated desaturase activities and risk of type 2 diabetes or coronary artery disease**

|             |                                        |                                        | <b>D6D</b>       |           | <b>D5D</b>       |           | <b>T2DM</b>        | <b>CAD</b>         |
|-------------|----------------------------------------|----------------------------------------|------------------|-----------|------------------|-----------|--------------------|--------------------|
| <b>SNP</b>  | <b>Chr:position<br/>(Locus)</b>        | <b>Effect allele/<br/>Other allele</b> | <b>beta (SE)</b> | <b>p</b>  | <b>beta (SE)</b> | <b>p</b>  | <b>OR (95% CI)</b> | <b>OR (95% CI)</b> |
| rs2608073   | 3:142653512<br>( <i>RP11-372E1.4</i> ) | T/C                                    | -0.09 (0.06)     | 0.16      | -0.38 (0.06)     | 1.08E-09  | 1.01 (0.99 -1.03)  | 1.01 (0.98 -1.05)  |
| rs174555*   | 11:61579760<br>( <i>FADS1</i> )        | C/T                                    | -0.33 (0.03)     | 8.27E-22  | -0.83 (0.03)     | 3.23E-140 | 0.98 (0.96 -0.99)  | 0.98 (0.96 -0.99)  |
| rs61897792  | 11:61586886<br>( <i>FADS1</i> )        | T/C                                    | 0.1 (0.06)       | 0.10      | 0.35 (0.06)      | 1.05E-08  | 1.02 (1.00 -1.04)  | 1.05 (1.02 -1.08)  |
| rs174582*   | 11:61607168<br>( <i>FADS2</i> )        | G/A                                    | -0.18 (0.04)     | 2.45E-06  | -0.82 (0.04)     | 1.95E-106 | 0.98 (0.96 -0.99)  | 0.97 (0.95 -0.99)  |
| rs2851682*  | 11:61616012<br>( <i>FADS2</i> )        | G/A                                    | -0.48 (0.05)     | 3.25E-20  | -0.40 (0.05)     | 7.50E-14  | 0.98 (0.96 -1.00)  | 0.99 (0.96 -1.01)  |
| rs174602*   | 11:61624414<br>( <i>FADS2</i> )        | C/T                                    | -0.19 (0.04)     | 1.13E-05  | -0.35 (0.04)     | 1.63E-15  | 0.97 (0.95 -0.99)  | 0.98 (0.95 -1.00)  |
| rs498793*   | 11:61624705<br>( <i>FADS2</i> )        | C/T                                    | -0.17 (0.03)     | 6.416E-07 | -0.28 (0.04)     | 1.47E-15  | 0.98 (0.97 -0.99)  | 0.98 (0.96 -1.00)  |
| rs174621*   | 11:61630104<br>( <i>FADS2</i> )        | A/G                                    | -0.19 (0.04)     | 1.57E-06  | -0.60 (0.04)     | 1.72E-52  | 0.99 (0.97 -1.00)  | 0.98 (0.96 -1.00)  |
| rs508768    | 11:61639335<br>( <i>FADS3</i> )        | G/A                                    | 0.12 (0.06)      | 0.04      | 0.28 (0.06)      | 3.04E-06  | 0.98 (0.96 -1.00)  | 1.02 (0.99 -1.05)  |
| rs7118175*  | 11:61639358<br>( <i>FADS2</i> )        | T/C                                    | 0.23 (0.06)      | 3.97E-05  | 0.32 (0.06)      | 4.59E-08  | 1.01 (0.99 -1.03)  | 1.03 (1.00 -1.06)  |
| rs174462*   | 11:61657666<br>( <i>FADS3</i> )        | A/G                                    | -0.2 (0.04)      | 5.37E-06  | -0.49 (0.04)     | 6.57E-27  | 1.00 (0.98 -1.02)  | 0.98 (0.96 -1.00)  |
| rs11644601* | 16:15172118<br>( <i>RRN3</i> )         | C/T                                    | 0.14 (0.04)      | 1.75E-04  | -0.24 (0.04)     | 5.24E-10  | 0.98 (0.97 -0.99)  | 0.98 (0.96 -1.00)  |

CAD, coronary artery disease; CI, confidence interval; D5D, delta-5-desaturase; D6D, delta-6-desaturase; SE, standard error; T2DM, type 2 diabetes;

\* gene-wide significant for both desaturases (P < [0.05/169])



**Supplemental Table 7 Direct effects of estimated desaturase activities and risk of type 2 diabetes or coronary artery disease using multivariable MR-Egger**

|            |                                                      | T2DM      |                       |             |                            | CAD        |                       |             |                               |
|------------|------------------------------------------------------|-----------|-----------------------|-------------|----------------------------|------------|-----------------------|-------------|-------------------------------|
|            |                                                      | N (SNPs)* | OR<br>(95% CI)        | P-<br>value | Intercept (SE),<br>p-value | N (SNPs)** | OR<br>(95% CI)        | P-<br>value | Intercept<br>(SE),<br>p-value |
| <b>D6D</b> | instruments from <i>FADS</i>                         | 10        | 1.02<br>(0.93 - 1.12) | 0.632       | 0.009 (0.014), 0.544       | 10         | 0.98<br>(0.91 - 1.05) | 0.503       | 0.021 (0.015),<br>0.151       |
|            | instruments from <i>FADS</i><br>and genome-wide hits | 12        | 1.03<br>(0.95 - 1.12) | 0.440       | -0.005 (0.010), 0.592      | 12         | 1.02<br>(0.94 - 1.01) | 0.679       | -0.008 (0.015),<br>0.621      |
| <b>D5D</b> | instruments from <i>FADS</i>                         | 10        | 0.98<br>(0.92 - 1.05) | 0.543       | 0.009 (0.014), 0.544       | 10         | 1.02<br>(0.97 - 1.07) | 0.402       | 0.021 (0.015),<br>0.151       |
|            | instruments from <i>FADS</i><br>and genome-wide hits | 12        | 1.01<br>(0.96 - 1.05) | 0.827       | -0.005 (0.010), 0.592      | 12         | 1.04<br>(0.98 - 1.01) | 0.180       | -0.008 (0.015),<br>0.621      |

CAD, coronary artery disease; CI, confidence interval; D5D, delta-5-desaturase; D6D, delta-6-desaturase; OR, odds ratio; SE, standard error; T2DM, type 2 diabetes

Multivariable MR Egger estimates of the effect of D5D and D6D on T2DM and CAD.

For MR Egger analysis it is crucial to align all of the SNPs in a way that they have a positive effect on the exposure. To do so we repeated the analysis and first set the genetic associations with D6D to be positive (presented in the table) and second vice versa for D5D. This adjustment made no difference to the results obtained when using only instruments from *FADS* and only minor changes were observed when using additional genome-wide hits.

**Supplemental Table 8 Direct effects of estimated desaturase activities and risk of type 2 diabetes or coronary artery disease excluding outlying variants**

|            |                                                   | T2DM      |                    |         | CAD       |                    |         |
|------------|---------------------------------------------------|-----------|--------------------|---------|-----------|--------------------|---------|
|            |                                                   | N (SNPs)* | OR (95% CI)        | P-Value | N (SNPs)* | OR (95% CI)        | P-Value |
| <b>D6D</b> | instruments from <i>FADS</i>                      | 8         | 1.05 (0.94 - 1.18) | 0.377   | 8         | 1.02 (0.93 - 1.11) | 0.741   |
|            | instruments from <i>FADS</i> and genome-wide hits | 10        | 1.02 (0.96 - 1.08) | 0.527   | 10        | 1.00 (0.94- 1.06)  | 0.992   |
| <b>D5D</b> | instruments from <i>FADS</i>                      | 8         | 0.98 (0.93 - 1.03) | 0.439   | 8         | 1.03 (0.97 - 1.09) | 0.336   |
|            | instruments from <i>FADS</i> and genome-wide hits | 10        | 1.00 (0.97 - 1.02) | 0.748   | 10        | 1.04 (1.00 - 1.08) | 0.087   |

CAD, coronary artery disease; CI, confidence interval; D5D, delta-5-desaturase; D6D, delta-6-desaturase; OR, odds ratio; T2DM, type 2 diabetes

\*two outlying instruments (rs174602, rs508768) determined by radial MR were excluded from analyses.

**Supplemental Table 9 Direct effects of estimated desaturase activities and risk of type 2 diabetes or coronary artery disease excluding outlying variants**

|            |                                                   | T2DM      |                    |         | CAD       |                    |         |
|------------|---------------------------------------------------|-----------|--------------------|---------|-----------|--------------------|---------|
|            |                                                   | N (SNPs)* | OR (95% CI)        | P-Value | N (SNPs)* | OR (95% CI)        | P-Value |
| <b>D6D</b> | instruments from <i>FADS</i>                      | 7         | 1.06 (0.96 - 1.17) | 0.233   | 7         | 1.01 (0.94 - 1.08) | 0.876   |
|            | instruments from <i>FADS</i> and genome-wide hits | 9         | 1.02 (0.98 - 1.07) | 0.313   | 9         | 1.01 (0.94 - 1.08) | 0.809   |
| <b>D5D</b> | instruments from <i>FADS</i>                      | 7         | 0.98 (0.94 - 1.02) | 0.277   | 7         | 1.03 (0.99 - 1.07) | 0.161   |
|            | instruments from <i>FADS</i> and genome-wide hits | 9         | 0.99 (0.97 - 1.01) | 0.485   | 9         | 1.02 (0.98 - 1.05) | 0.318   |

CAD, coronary artery disease; CI, confidence interval; D5D, delta-5-desaturase; D6D, delta-6-desaturase; OR, odds ratio; T2DM, type 2 diabetes

\*three outlying instruments (rs174602, rs508768, rs61897792) determined by radial MR were excluded from analyses.

**Supplemental Table 10 Total and direct effects of estimated desaturase activities and risk of type 2 diabetes and coronary artery disease accounting for confounding by LD, excluding rs174602**

| T2DM       |        |          |                       |         | CAD      |                       |         |
|------------|--------|----------|-----------------------|---------|----------|-----------------------|---------|
|            | Method | N (SNPs) | OR (95% CI)           | P-Value | N (SNPs) | OR (95% CI)           | P-Value |
| <b>D6D</b> | IVW*   | 2 †      | 1.10<br>(1.03 - 1.17) | 0.006   | 2 †      | 1.11<br>(1.02 - 1.22) | 0.002   |
|            | MVIVW* | 2 †      | 0.71<br>(0.18 - 2.73) | 0.617   | 2 †      | 1.32<br>(0.02 - 8.82) | 0.778   |
| <b>D5D</b> | MVIVW* | 2 †      | 1.33<br>(0.51 - 3.50) | 0.562   | 2 †      | 0.90<br>(0.26 - 3.12) | 0.866   |

\* fixed effect model

† including only *FADS1*-independent ( $R^2 < 0.31$ ) *FADS2* variants (rs498793, rs7118175)

## Study population

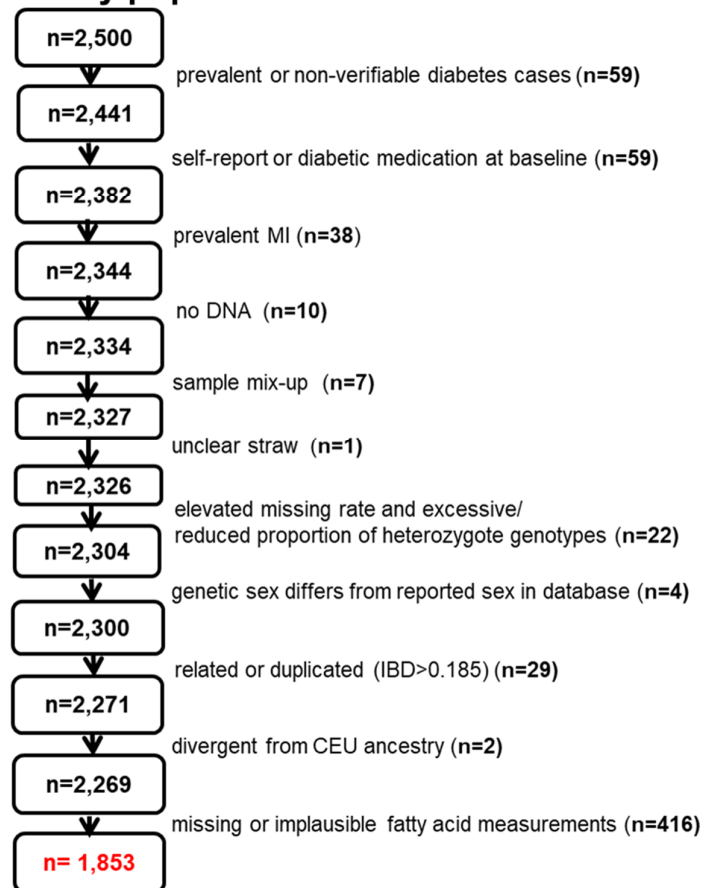

**Supplemental Figure 1 Flow-chart of final study population**

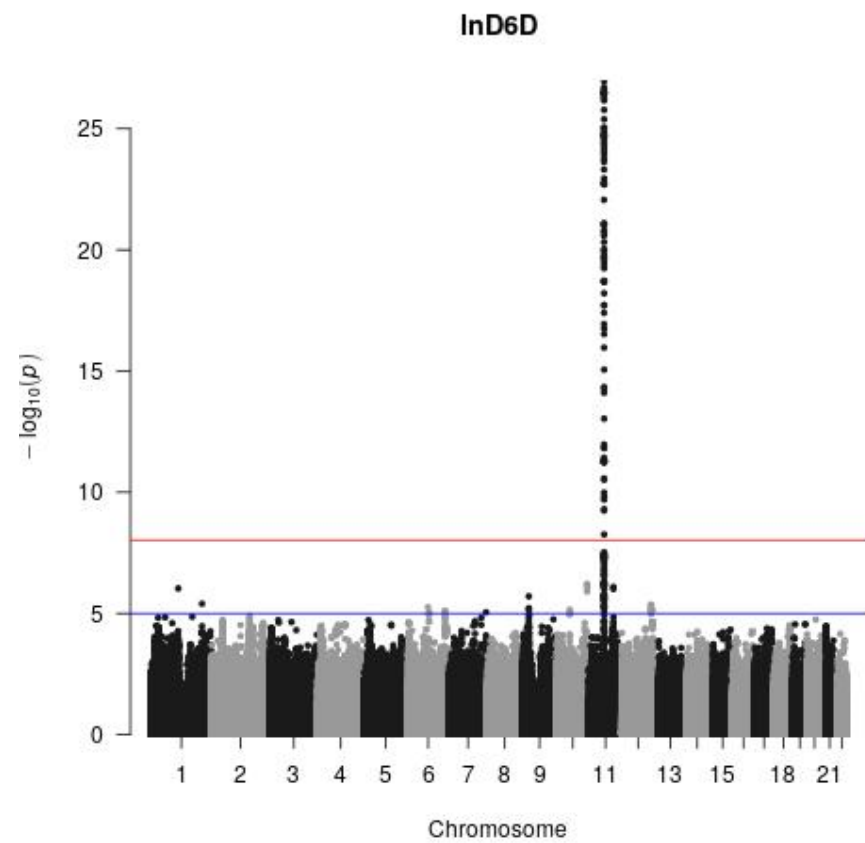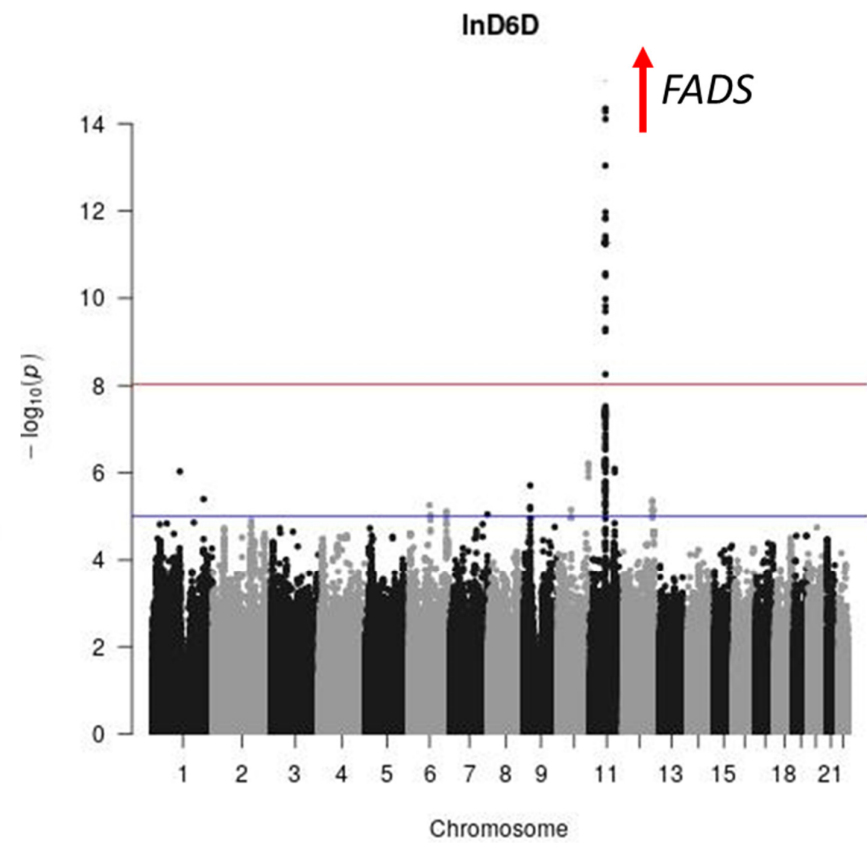

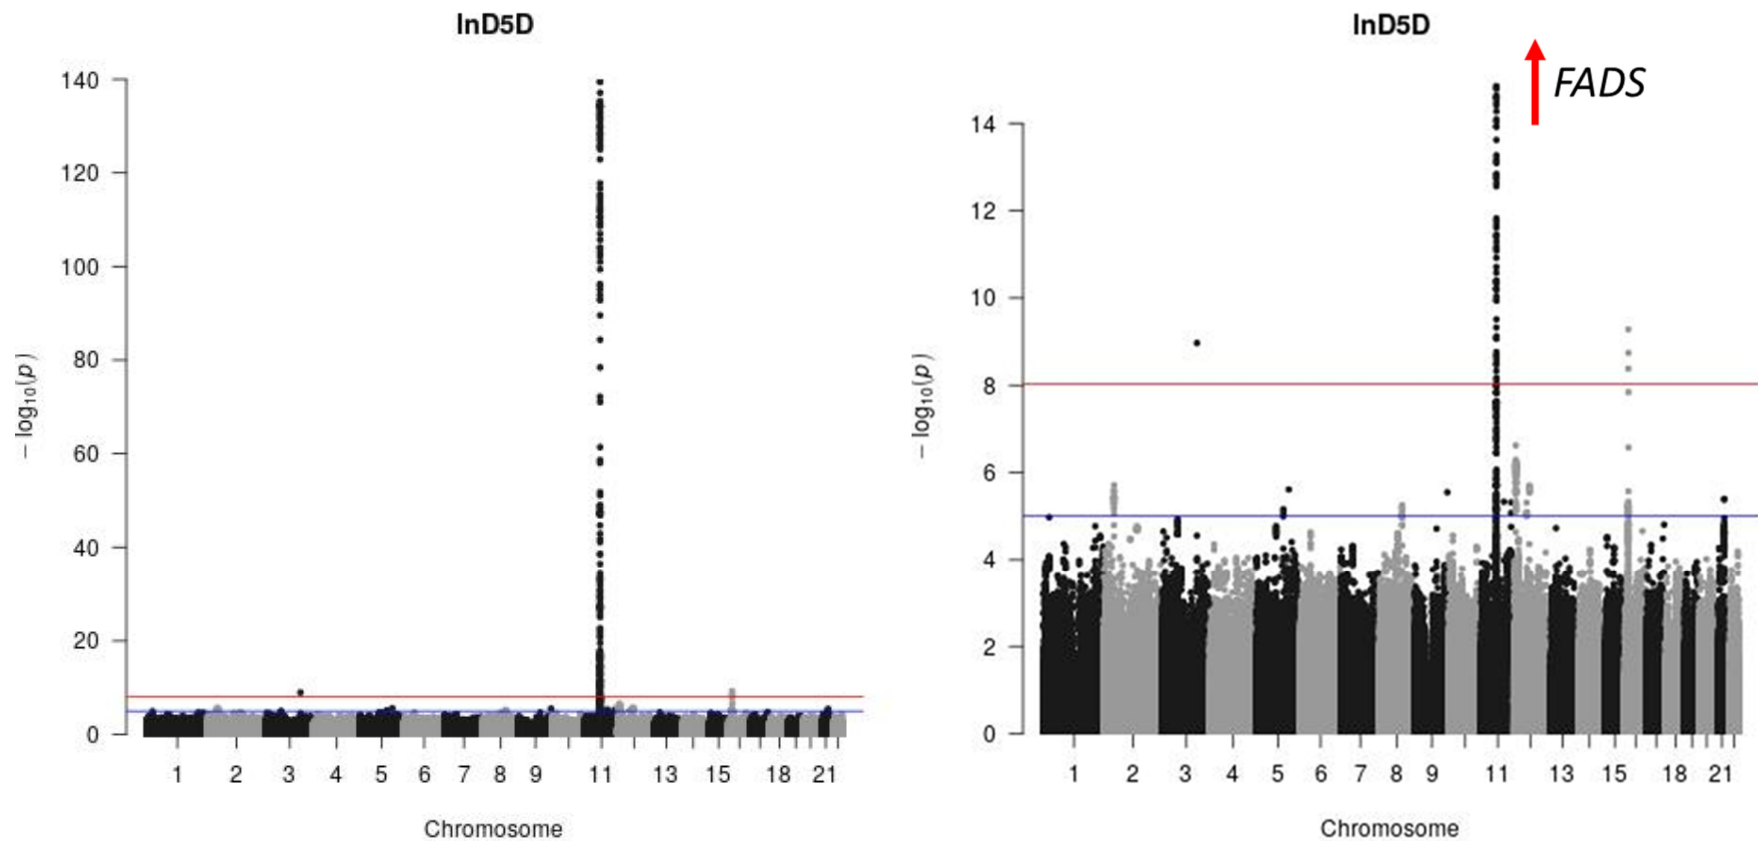

**Supplemental Figure 2 Manhattan plots visualizing GWAS results for D6D and D5D**

The Manhattan plots depict the distribution of association test statistics versus genomic position, with chromosomes 1 to 22 on the X axis. The Y axis represents log10-scaled p-values. The horizontal red line indicates the genome-wide significance threshold ( $9.36 \times 10^{-9}$ ); the horizontal blue line depicts the suggestive significance threshold ( $1 \times 10^{-5}$ ). Plots on the left visualize all GWAS results while for plots on the right the y-axis was truncated at  $-\log_{10}(p)=15$  to standardize the y-axis for D6D and D5D.

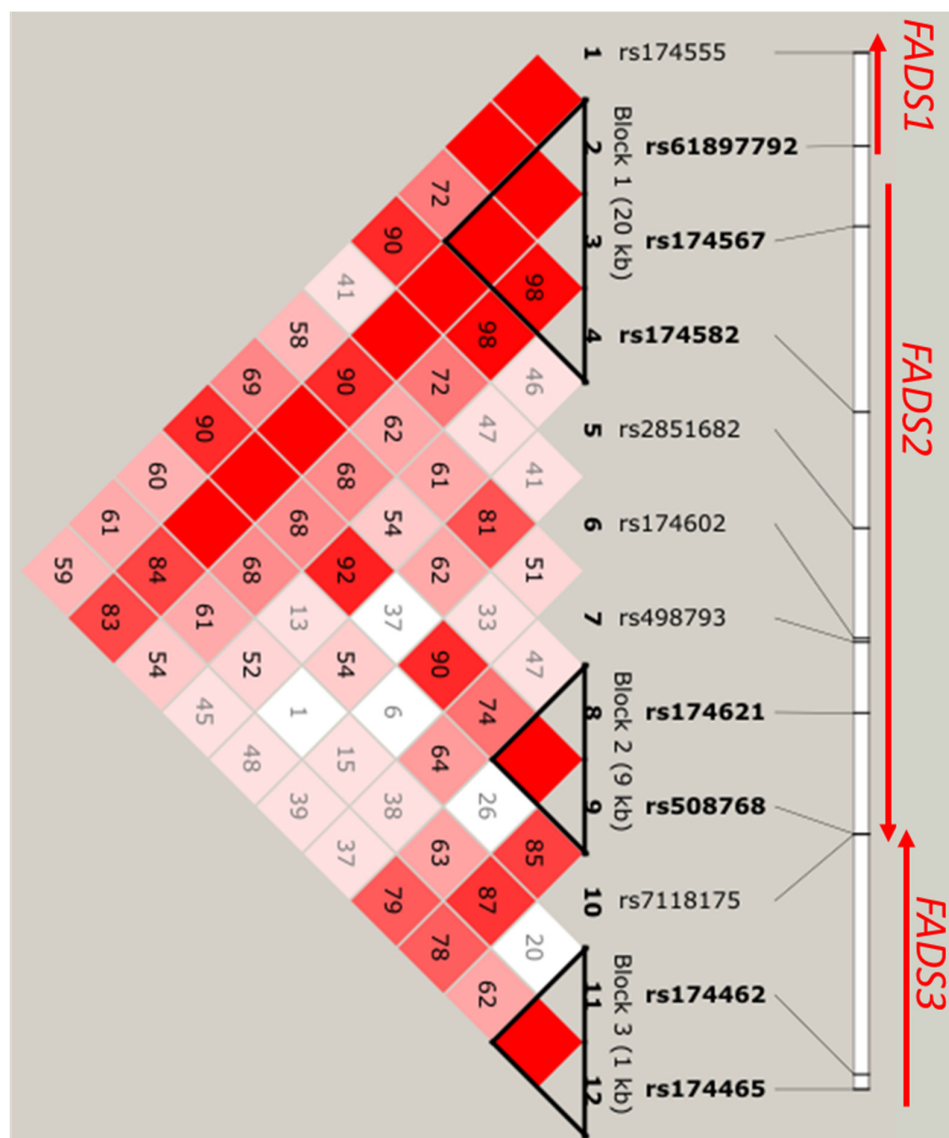

**Supplemental Figure 3 LD-Plot visualizing the degree of linkage disequilibrium between genetic instruments from *FADS* gene region evaluated within the study**

Haploview analysis for  $D'$  and  $r^2$  pairwise measures of LD between genetic instruments from the EPIC-Potsdam study population. Blocks were defined using default GAB method.  $D'$  values and confidence levels (LOD) are represented as bright red for  $D' = 1$ ,  $LOD \geq 2$ ; shades of pink/red for high  $D' < 1$ ,  $LOD \geq 2$ ; white for  $D' < 1$ ,  $LOD < 2$ . The numbers within the squares represent the  $D'$  scores for pairwise LD.





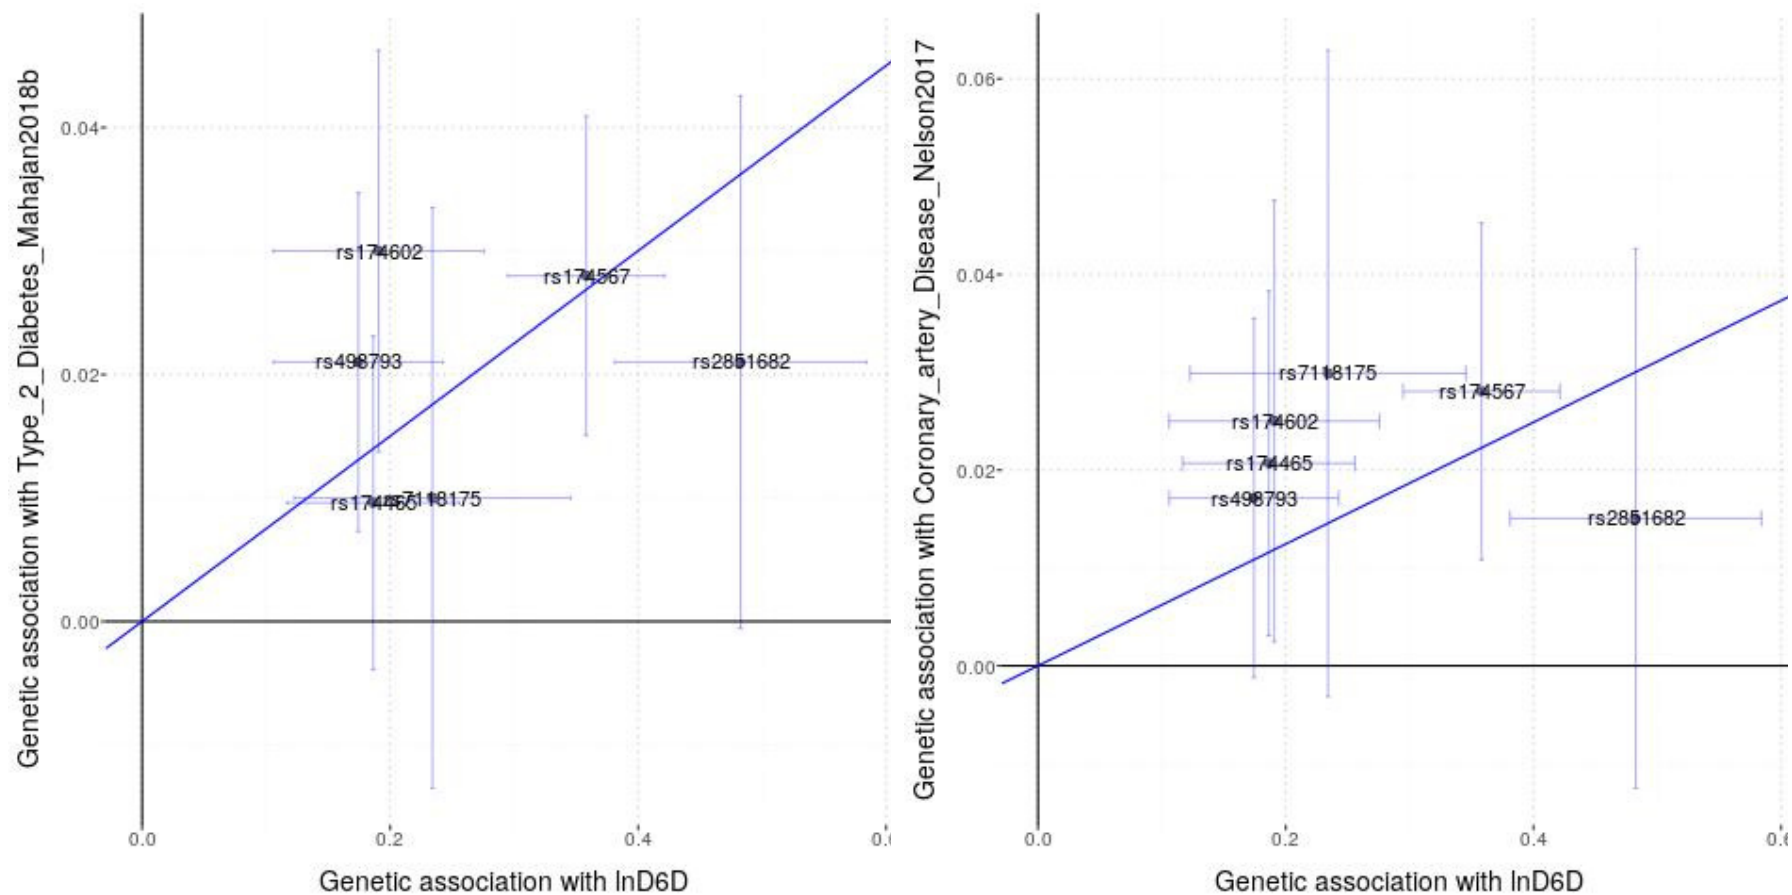

**Supplemental Figure 4 Scatter plots visualizing genetic associations with D6D and type 2 diabetes (left panel) and coronary artery disease (right panel)**

Each point represents the per allele associations of a single genetic variant within *FADS* (lines from each point are 95% confidence intervals for the associations). The slope of the regression represents the estimate of the causal effect of the exposure on the outcome determined by IVW method.

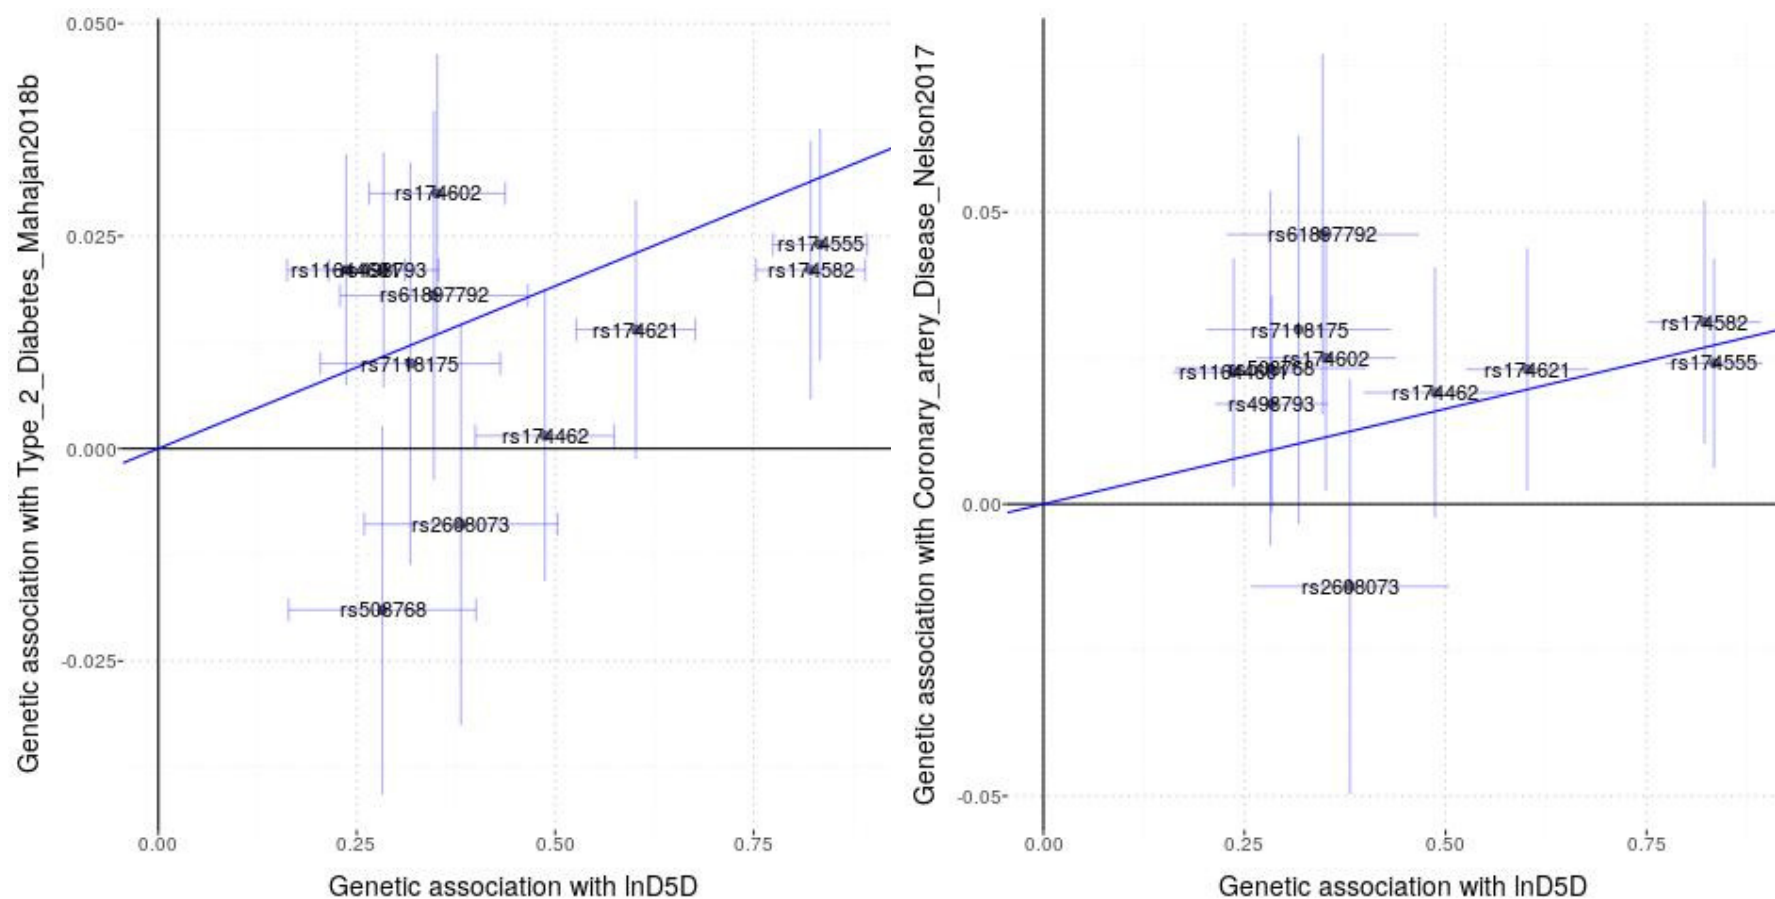

**Supplemental Figure 5 Scatter plots visualizing genetic associations with D5D and type 2 diabetes (left panel) and coronary artery disease (right panel)**

Each point represents the per allele associations of a single genetic variant within *FADS* and genome-wide significant hits (lines from each point are 95% confidence intervals for the associations). The slope of the regression represents the estimate of the causal effect of the exposure on the outcome determined by IVW method.

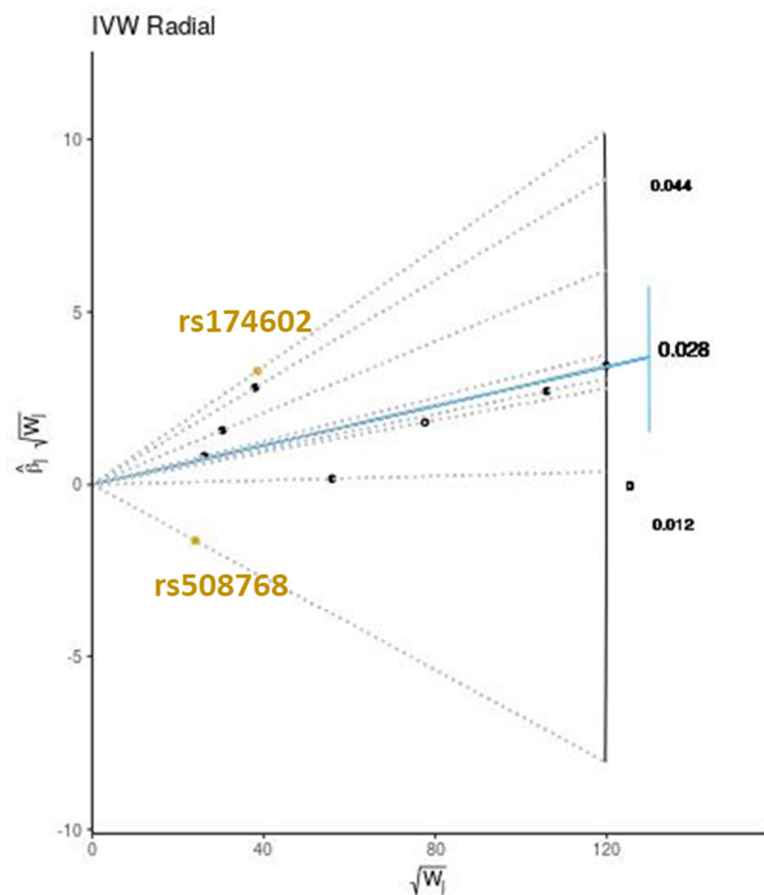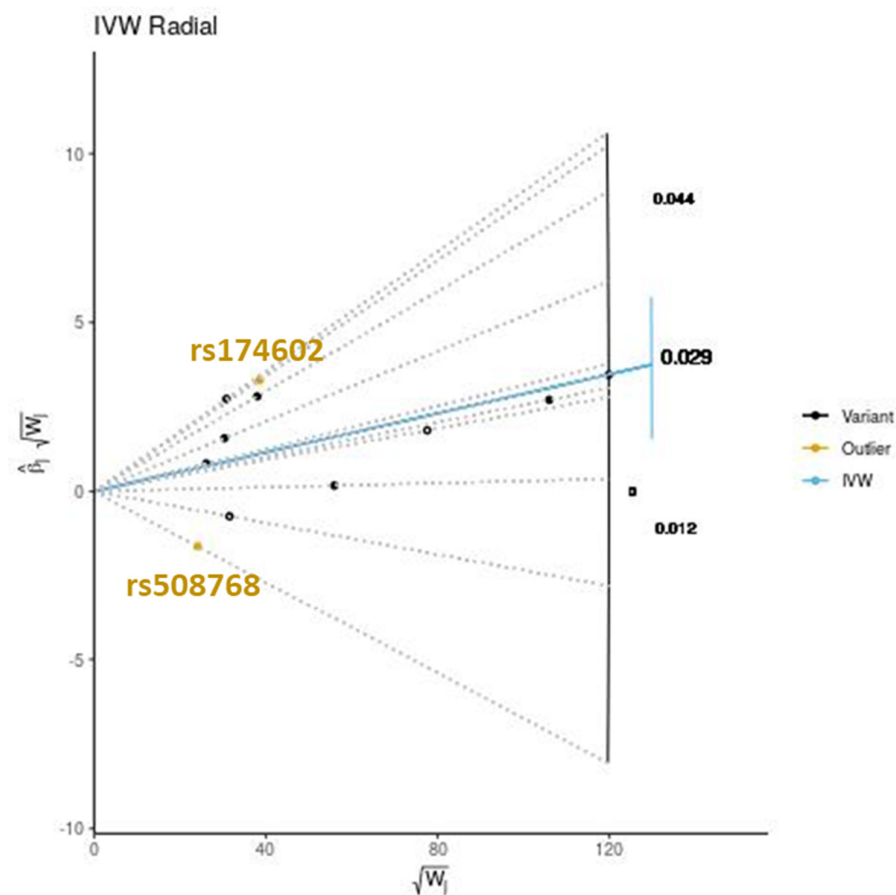

### Supplemental Figure 6 Radial MR plot for D5D and type 2 diabetes

Radial curve displays the ratio estimate for each genetic variant (in black), as well as the overall inverse variance weighted (IVW) estimate (in blue). Data points with large contributions to Cochran's Q statistic are shown in yellow, with an alpha of 0.05. The graph in the left panel visualizes all included *FADS* instruments while the graph in the right panel includes additional genome-wide hits.

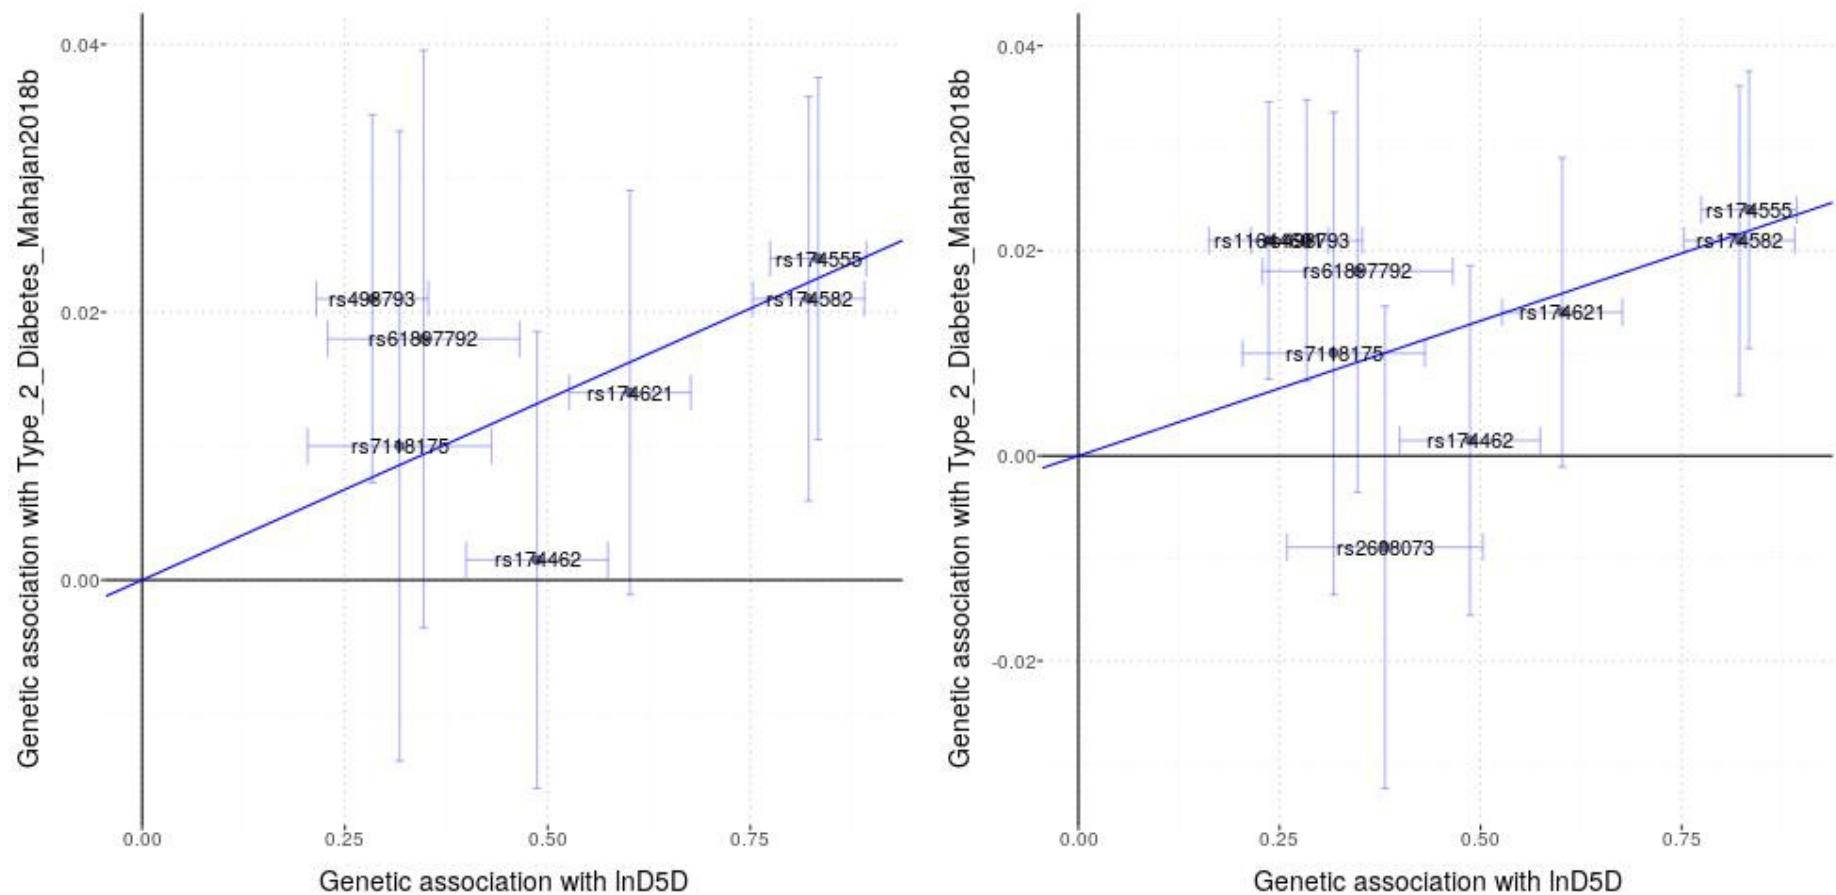

**Supplemental Figure 7 Scatter plots visualizing genetic associations with D5D and type 2 diabetes after outlier removal**

Each point represents the per allele associations of a single genetic variant (lines from each point are 95% confidence intervals for the associations). The slope of the regression represents the estimate of the causal effect of the exposure on the outcome determined by IVW method. The graph in the left panel visualizes all included *FADS* instruments while the graph in the right panel includes additional genome-wide hits.

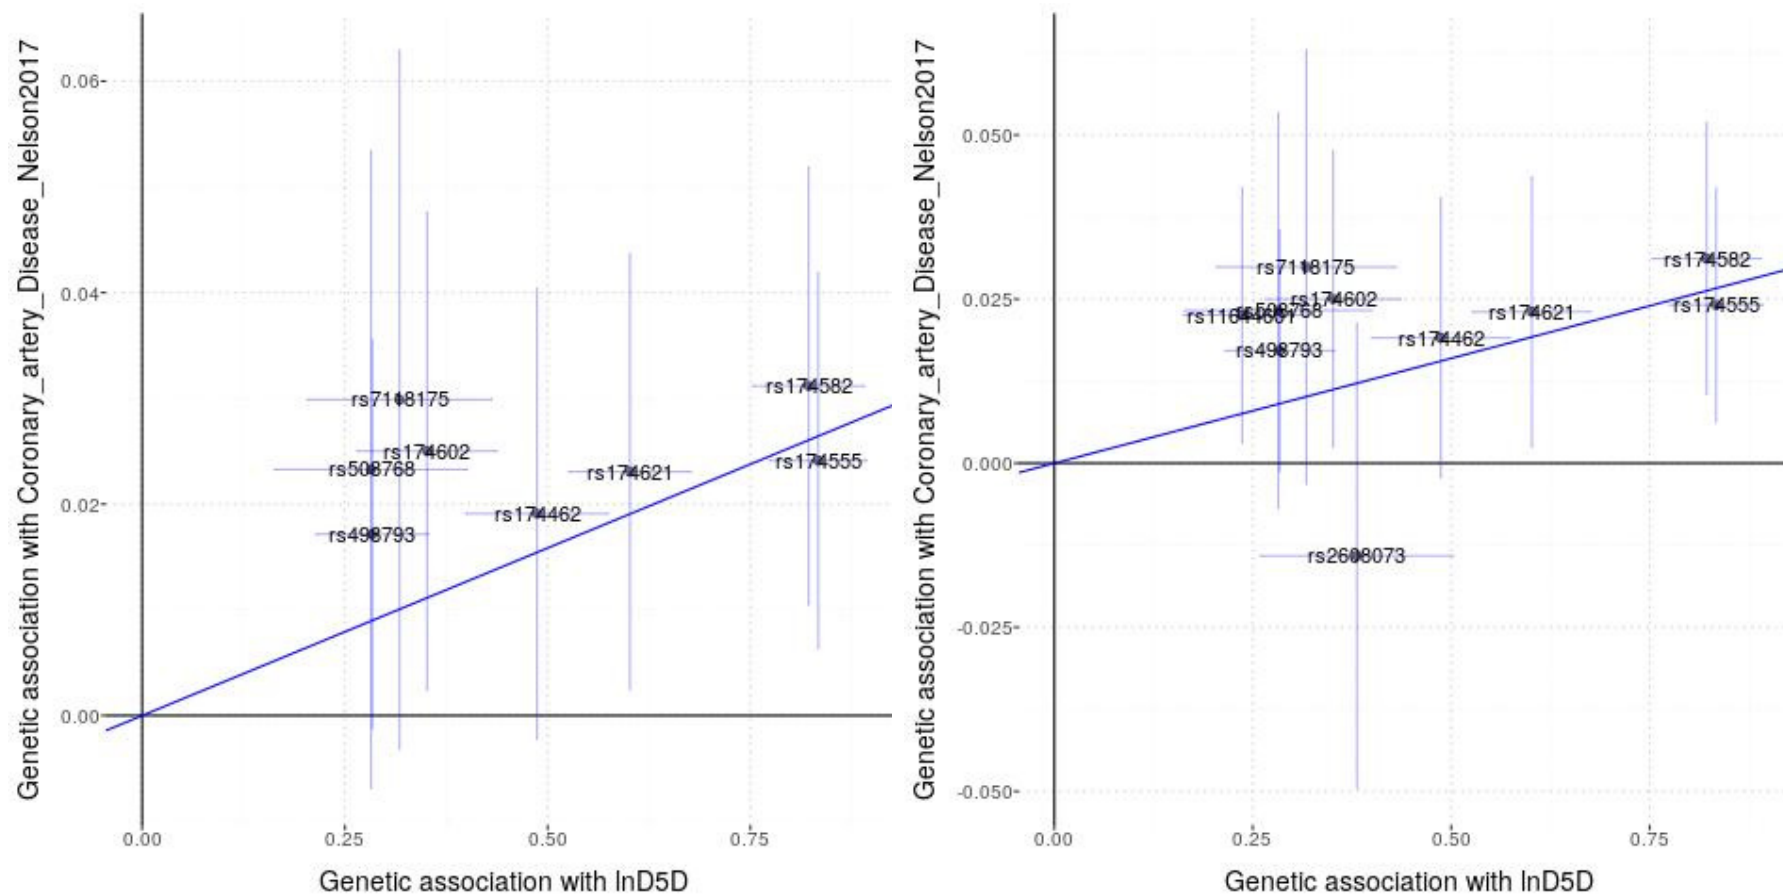

**Supplemental Figure 8 Scatter plots visualizing genetic associations with D5D and coronary artery disease after outlier removal**

Each point represents the per allele associations of a single genetic variant (lines from each point are 95% confidence intervals for the associations). The slope of the regression represents the estimate of the causal effect of the exposure on the outcome determined by IVW method. The graph in the left panel visualizes all included *FADS* instruments while the graph in the right panel includes additional genome-wide hits.

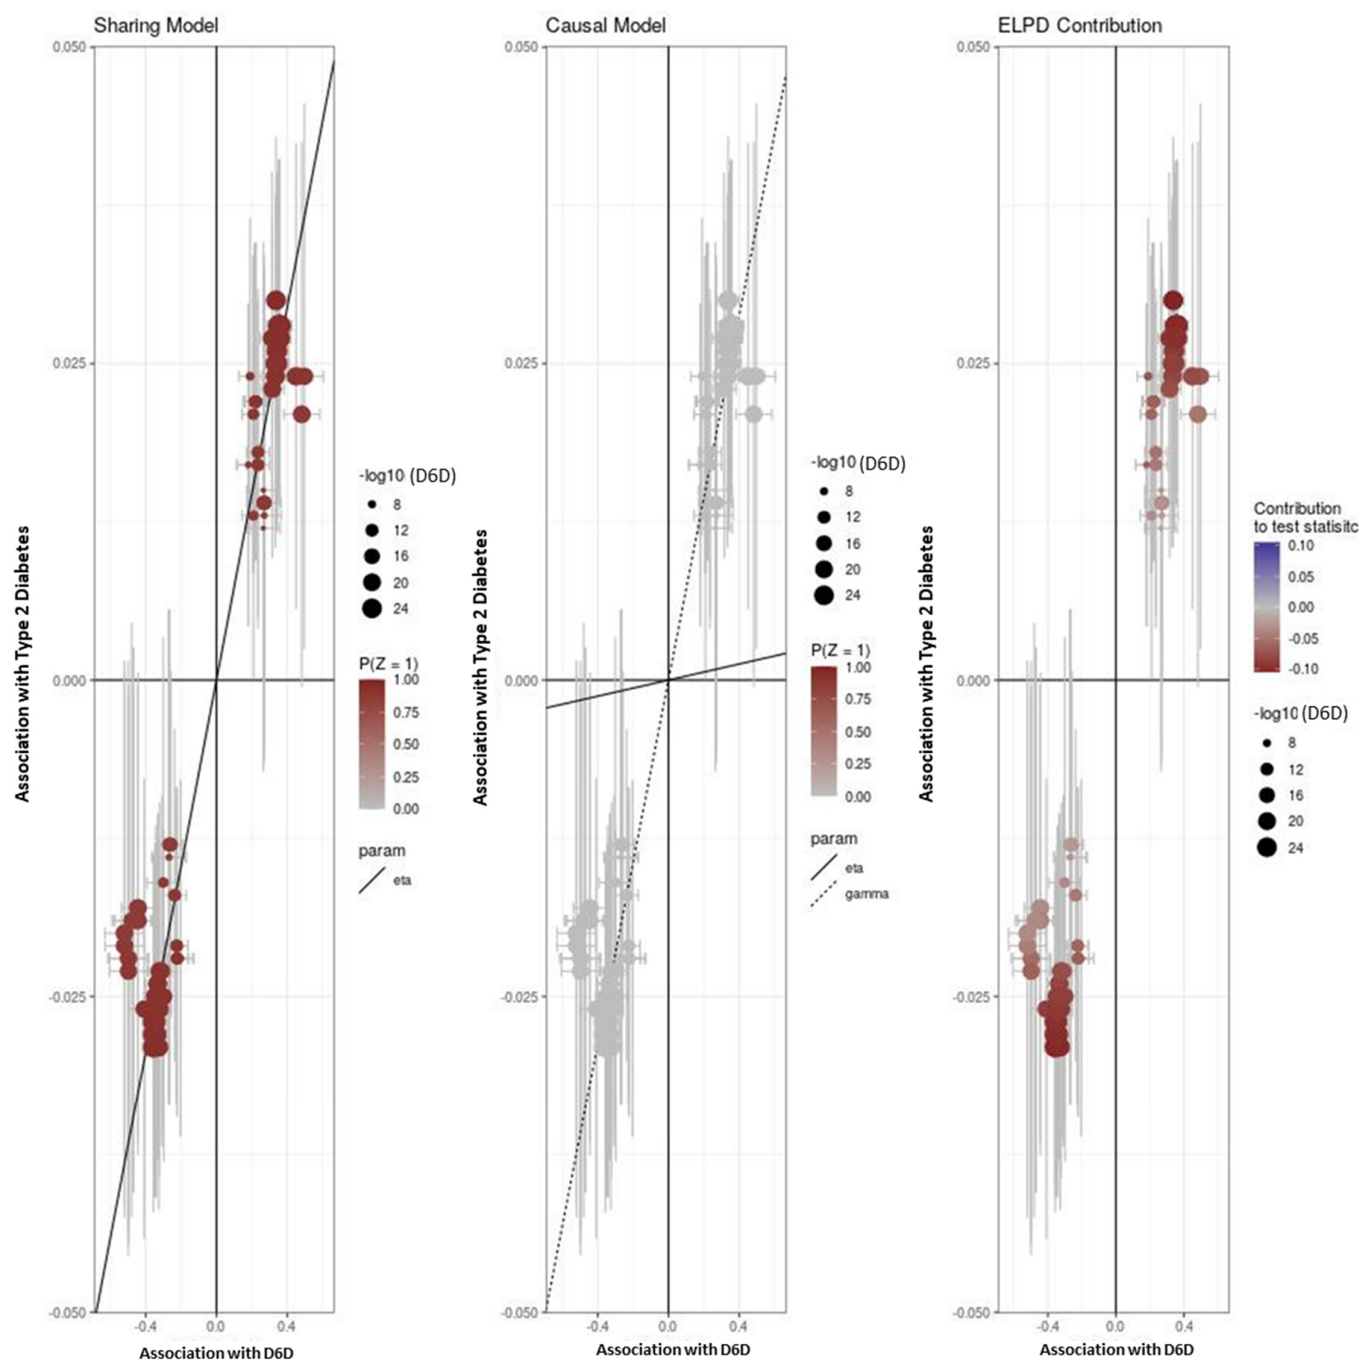

|   | model1  | model2  | delta_elpd | se_delta_elpd | z     | p       |  | model   | gamma             | eta               | q                 |
|---|---------|---------|------------|---------------|-------|---------|--|---------|-------------------|-------------------|-------------------|
| 1 | null    | sharing | -69        | 6.70          | -10.0 | 4.2e-25 |  | Sharing | NA                | 0.07 (0.06, 0.09) | 0.84 (0.72, 0.92) |
| 2 | null    | causal  | -78        | 7.60          | -10.0 | 1.2e-24 |  | Causal  | 0.07 (0.06, 0.08) | 0 (-0.2, 0.25)    | 0.02 (0, 0.23)    |
| 3 | sharing | causal  | -9         | 0.96          | -9.3  | 5.7e-21 |  |         |                   |                   |                   |

**Supplemental Figure 9** Effect-size estimates and variant-level contribution to CAUSE test statistics for D6D and type 2 diabetes.

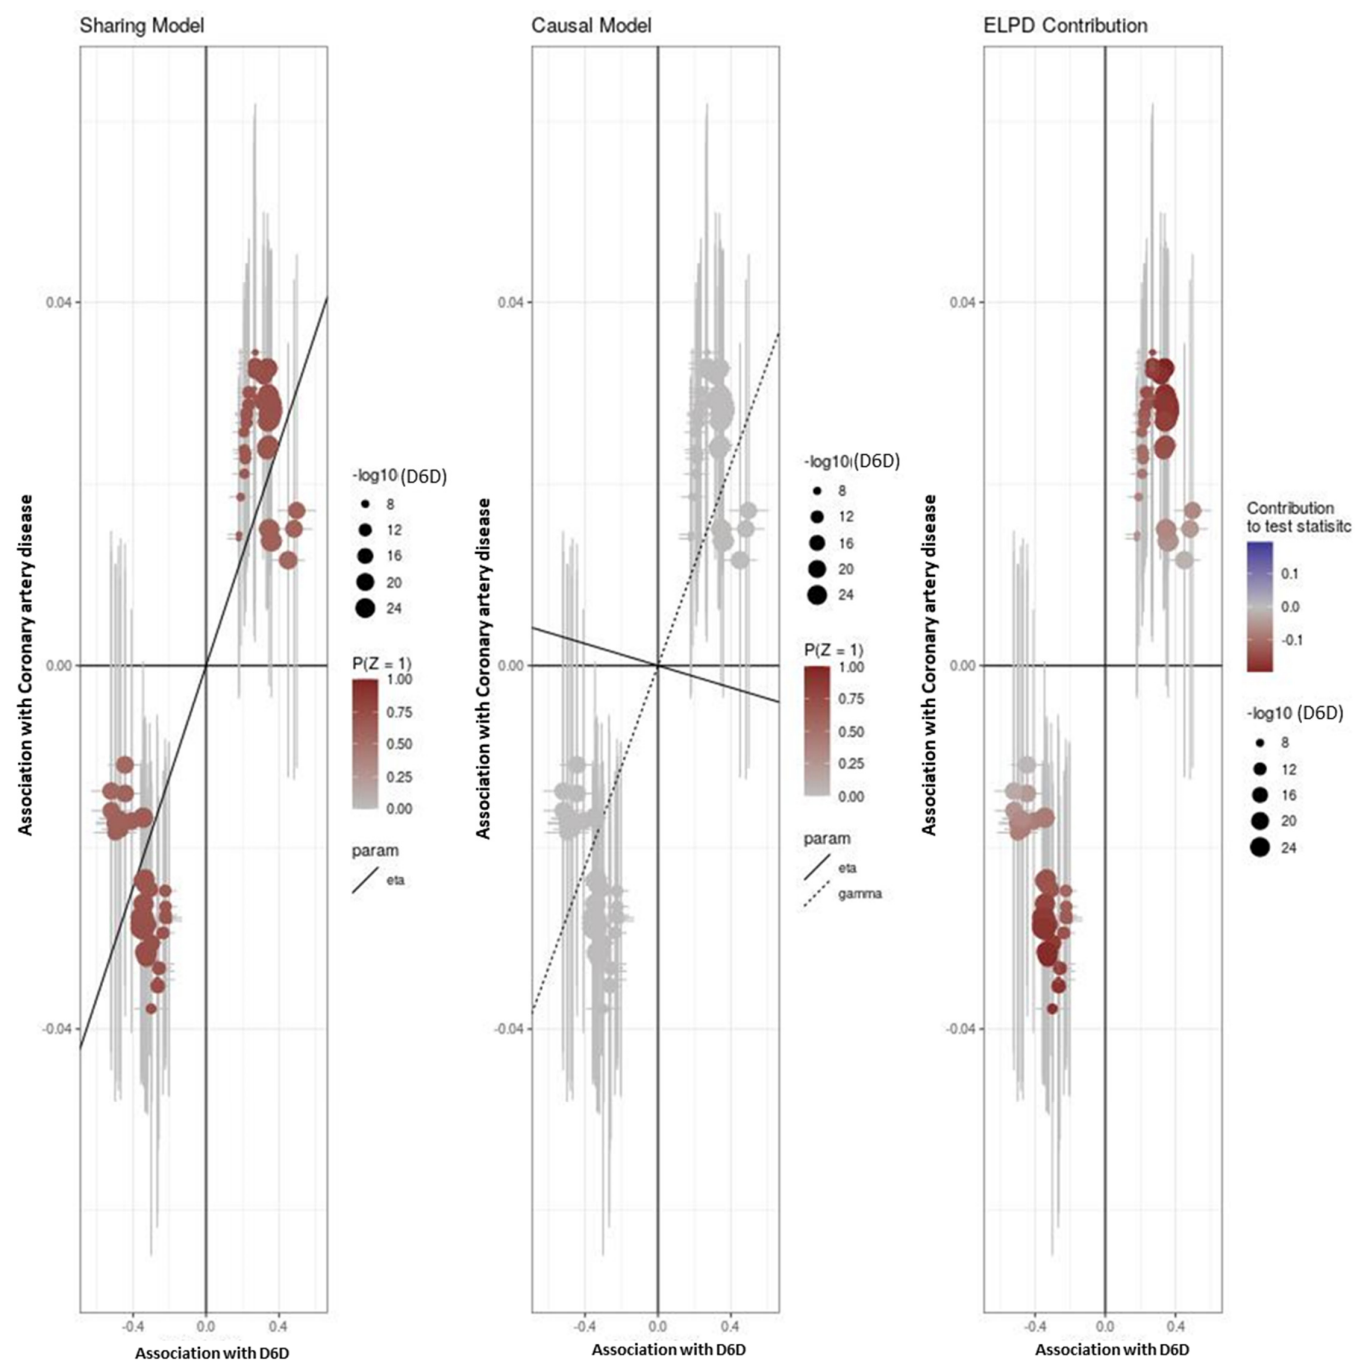

|   | model1  | model2  | delta_elpd | se_delta_elpd | z    | p       |  | model   | gamma             | eta                 | q                 |
|---|---------|---------|------------|---------------|------|---------|--|---------|-------------------|---------------------|-------------------|
| 1 | null    | sharing | -19.0      | 3.3           | -5.6 | 1.3e-08 |  | Sharing | NA                | 0.06 (0.04, 0.08)   | 0.59 (0.35, 0.78) |
| 2 | null    | causal  | -27.0      | 4.9           | -5.4 | 2.9e-08 |  | Causal  | 0.06 (0.04, 0.07) | -0.01 (-0.23, 0.14) | 0.03 (0, 0.24)    |
| 3 | sharing | causal  | -8.2       | 1.6           | -5.1 | 1.9e-07 |  |         |                   |                     |                   |

**Supplemental Figure 10** Effect-size estimates and variant-level contribution to CAUSE test statistics for D6D and coronary artery disease.



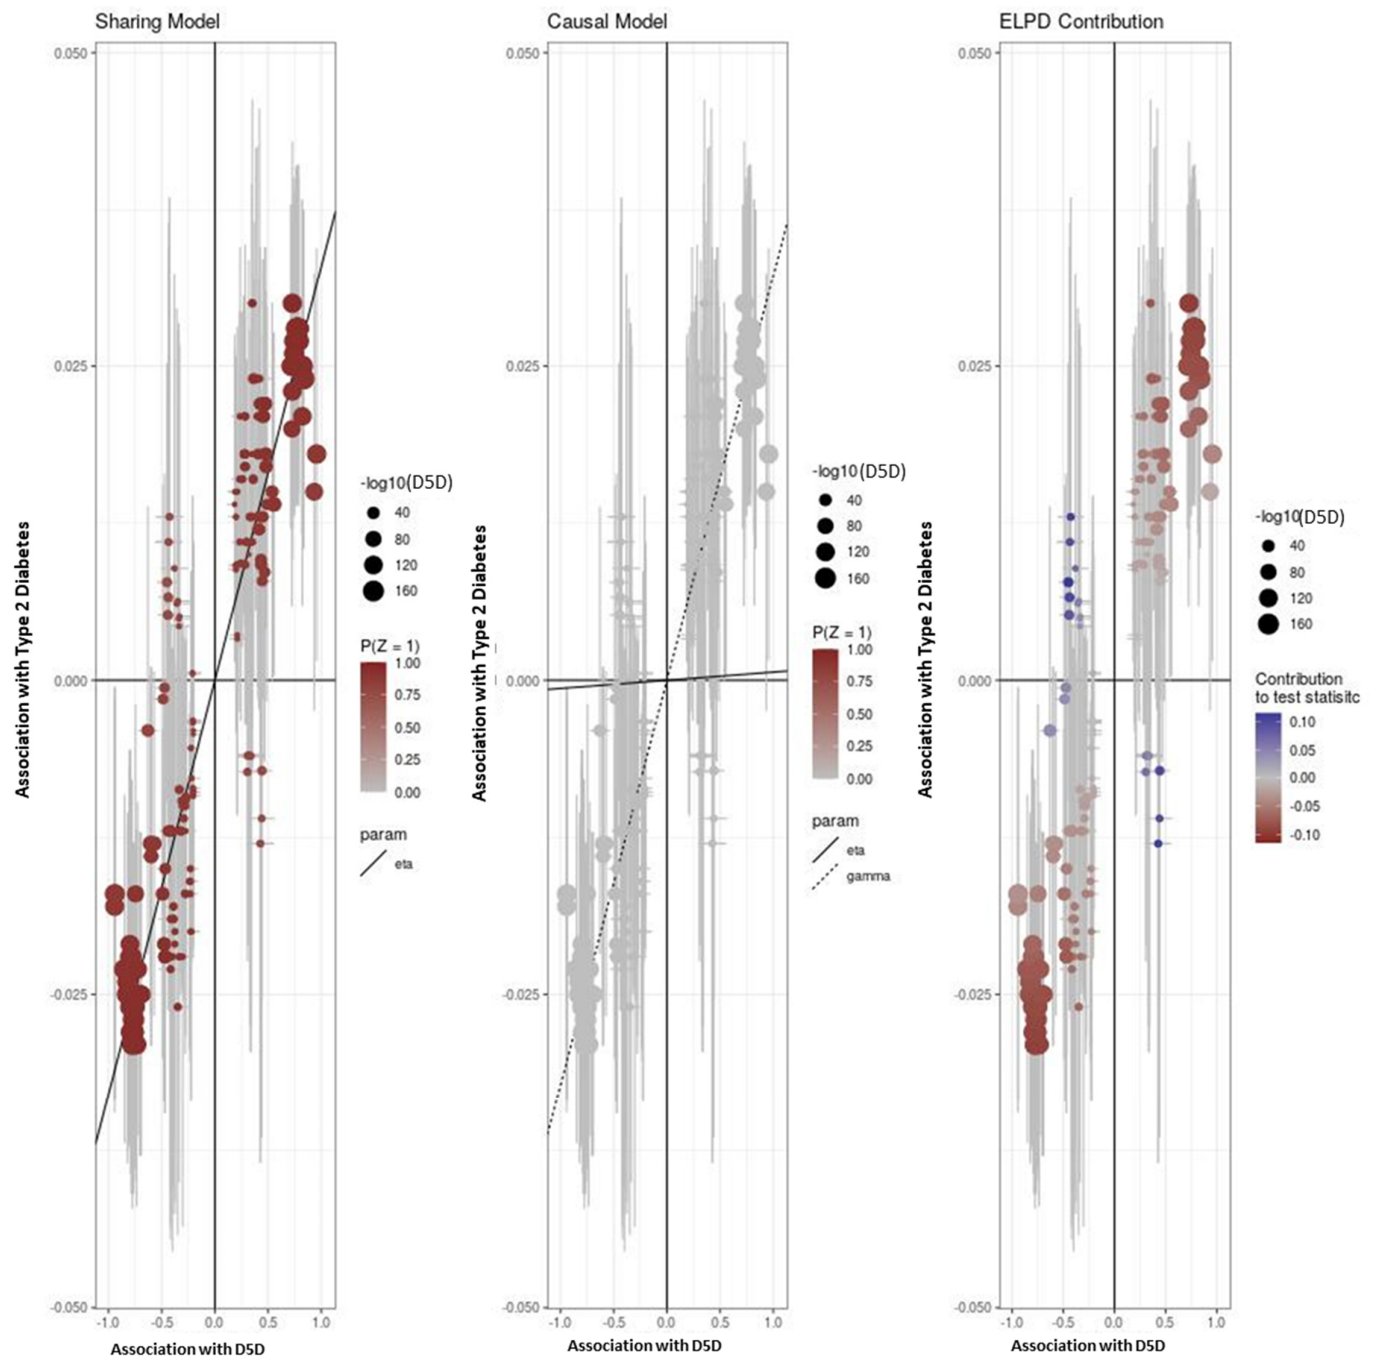

| model1 | model2  | delta_elpd | se_delta_elpd | z    | p     | model   | gamma   | eta               | q                 |                   |
|--------|---------|------------|---------------|------|-------|---------|---------|-------------------|-------------------|-------------------|
| 1      | null    | sharing    | -78.0         | 7.40 | -11.0 | 1.5e-26 | Sharing | NA                | 0.03 (0.03, 0.04) | 0.85 (0.75, 0.92) |
| 2      | null    | causal     | -87.0         | 8.30 | -11.0 | 4.0e-26 | Causal  | 0.03 (0.03, 0.04) | 0 (-0.15, 0.17)   | 0.02 (0, 0.23)    |
| 3      | sharing | causal     | -8.9          | 0.94 | -9.5  | 7.3e-22 |         |                   |                   |                   |

**Supplemental Figure 11 Effect-size estimates and variant-level contribution to CAUSE test statistics for D5D and type 2 diabetes.**



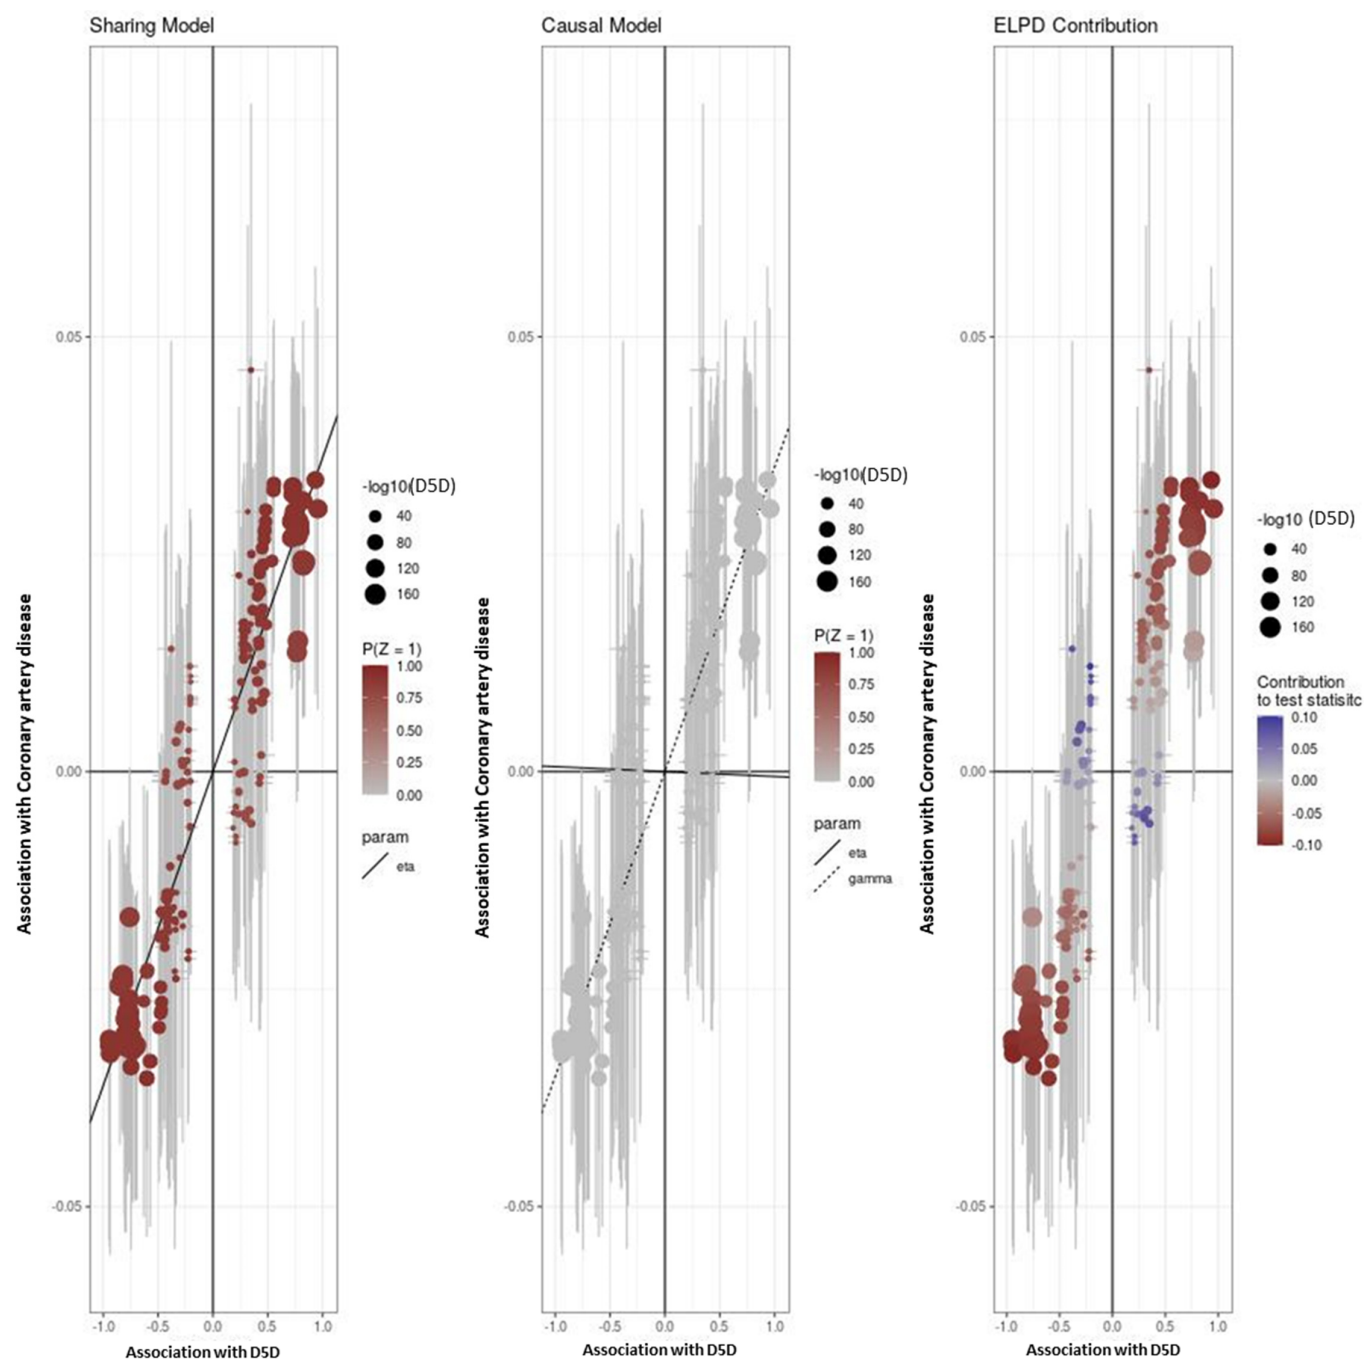

|   | model1  | model2  | delta_elpd | se_delta_elpd | z    | p       |  | model   | gamma             | eta               | q                |
|---|---------|---------|------------|---------------|------|---------|--|---------|-------------------|-------------------|------------------|
| 1 | null    | sharing | -62.0      | 6.4           | -9.7 | 2.1e-22 |  | Sharing | NA                | 0.04 (0.03, 0.04) | 0.82 (0.7, 0.91) |
| 2 | null    | causal  | -71.0      | 7.5           | -9.5 | 8.3e-22 |  | Causal  | 0.04 (0.03, 0.04) | 0 (-0.18, 0.18)   | 0.02 (0, 0.23)   |
| 3 | sharing | causal  | -8.7       | 1.0           | -8.5 | 9.6e-18 |  |         |                   |                   |                  |

**Supplemental Figure 12 Effect-size estimates and variant-level contribution to CAUSE test statistics for D5D and coronary artery disease.**
